# Supplementary material
Source: Elsevier journal article supplement (https://www.sciencedirect.com/science/article/pii/S002175572100173X)
Supplement: mmc1 [file S002175572100173X:mmc1.docx]

**JPED-D-21-00248_ Supplemental Material**

**Supplemental Material - Participanting PICUs characteristics.**

| **Hospitals** | **n = 15** |
| --- | --- |
| Private | 10 |
| Public academic | 2 |
| Private philanthropic | 2 |
| Public non-academic | 1 |
| **Number of hospital beds** |  |
| ≤100 | 2 |
| 101-300 | 9 |
| 301-500 | 2 |
| >500 | 2 |
| Total pediatric beds: median (IQ; range) | 32 (23-73; 18-144) |
| PICU beds: median (IQ; range) | 10 (8-13; 4-36) |
